# Supplementary material
Source: PubMed Central journal article supplement (PMC11113275)
Supplement: 18_2013_1259_MOESM2_ESM.pdf [file 18_2013_1259_MOESM2_ESM.pdf]

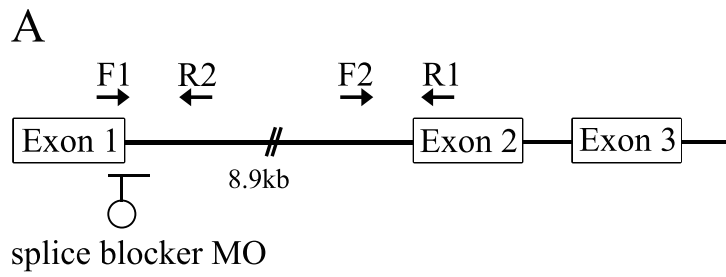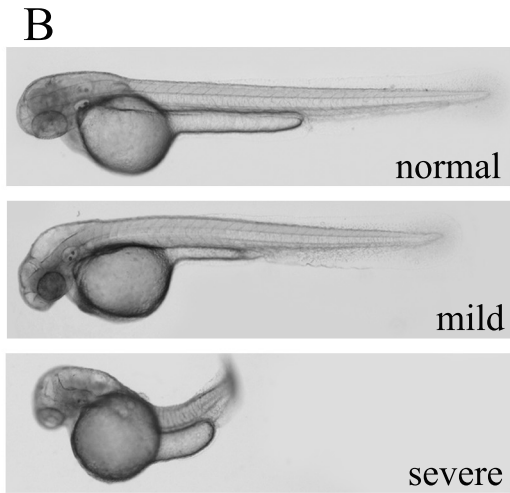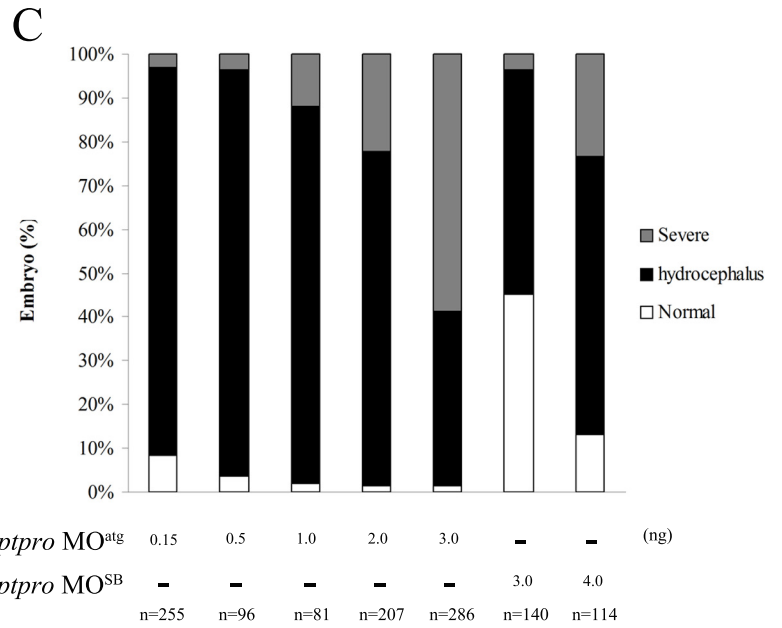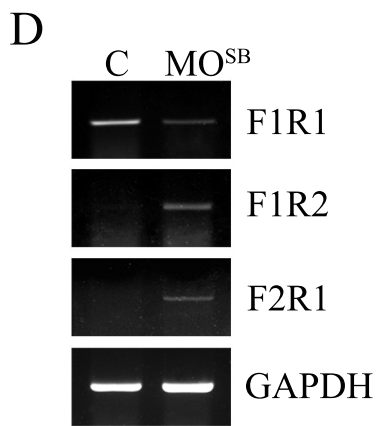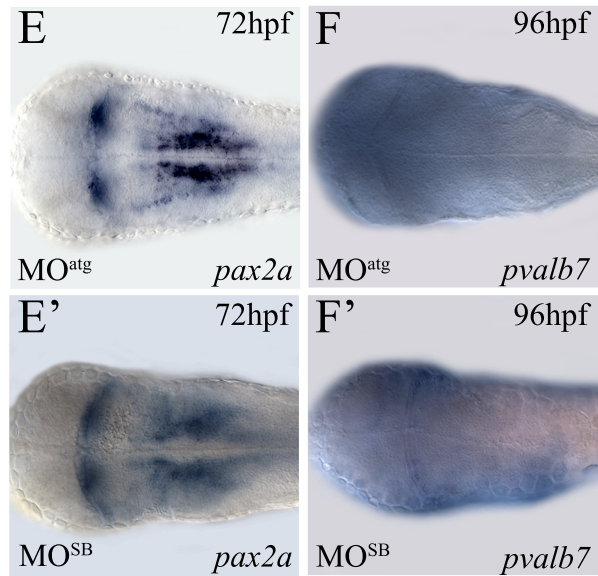

Supplemental Figure 2.
